# Supplementary material for: Publication Bias in Recent Meta-Analyses
Source: PubMed Central journal article supplement (PMC3868709; doi:10.1371/journal.pone.0081823), 2013-11-27
Supplement: pone.0081823.s003.pdf [file pone.0081823.s003.pdf]

### APPENDIX 3: WINBUGS CODE FOR THE MODEL WITH T-DISTRIBUTED STUDY-SPECIFIC MEANS

#### Parameters:

x: observed effect sizes  
s: the corresponding standard deviations  
N: number of observed effect sizes  
mu: mean effect size  
alpha: study-specific means  
v1, v2: parameters of the weight function  
bs\_sd: the square root of the between-study variance  
df: number of degrees of freedom of the distribution of the study-specific means

#### The model for $RR = P(\text{including statistically significant positive outcomes}) / P(\text{including other outcomes})$ :

```
model
{
C <- 10000 ## this just has to be large enough to ensure all ph[i]'s > 0
for(i in 1:N)
  {
  xs[i] <- step(x[i]/s[i]-1.96)
  q_std[i] <- -(1.96*s[i]-alpha[i])/s[i]
  CDFq[i] <- phi(q_std[i])
  minl[i] <- -log(xs[i]*v1+(1-xs[i])*v2)+0.5*pow((x[i]-alpha[i])/s[i],2)+log(v1*(1-
CDFq[i])+v2*CDFq[i]) ## -log likelihood

  ## the zero's trick, see: Winbugs help
  zeros[i] <- 0
  zeros[i] ~ dpois(ph[i])
  ph[i] <- minl[i]+C

  alpha[i] ~ dt(mu,bs_prec,df)
  }
RR <- v1/v2

## priors
mu ~ dnorm(0,0.000001)
bs_sd ~ dunif(0,10)
bs_var <- bs_sd*bs_sd
bs_prec <- 1/bs_var
v1 ~ dunif(0,1)
v2 ~ dunif(0,1)
df ~ dunif(2,100)
}
```

**The model for  $RR = P(\text{including statistically significant negative outcomes}) / P(\text{including other outcomes})$ :**

```

model
{
C <- 10000 ## this just has to be large enough to ensure all ph[i]'s > 0
for(i in 1:N)
{
xns[i] <- 1 - step(x[i]/s[i] + 1.96)
q_std[i] <- (-1.96*s[i] - alpha[i])/s[i]
CDFq[i] <- phi(q_std[i])
minl[i] <- -log(xns[i]*v1 + (1-xns[i])*v2) + 0.5*pow((x[i]-alpha[i])/s[i],2) + log(v1*CDFq[i] + v2*(1-
CDFq[i])) ## -log likelihood

## the zero's trick, see: Winbugs help
zeros[i] <- 0
zeros[i] ~ dpois(ph[i])
ph[i] <- minl[i] + C

alpha[i] ~ dt(mu, bs_prec, df)
}
RR <- v1/v2

## priors
mu ~ dnorm(0, 0.000001)
bs_sd ~ dunif(0, 10)
bs_var <- bs_sd*bs_sd
bs_prec <- 1/bs_var
v1 ~ dunif(0, 1)
v2 ~ dunif(0, 1)
df ~ dunif(2, 100)
}

```

**The model for  $RR = P(\text{including statistically significant outcomes}) / P(\text{including other outcomes})$ :**

```

model
{
C <- 10000 ## this just has to be large enough to ensure all ph[i]'s > 0
for(i in 1:N)
{
xs[i] <- step(abs(x[i]/s[i]) - 1.96)
CDF[i] <- phi((-1.96*s[i] - alpha[i])/s[i]) + 1 - phi((1.96*s[i] - alpha[i])/s[i])
minl[i] <- -log(xs[i]*v1 + (1-xs[i])*v2) + 0.5*pow((x[i]-alpha[i])/s[i],2) + log(v1*CDF[i] + v2*(1-
CDF[i])) ## -log likelihood

## the zero's trick, see: Winbugs help
zeros[i] <- 0
zeros[i] ~ dpois(ph[i])
ph[i] <- minl[i] + C
}

```

```
        alpha[i]~dt(mu,bs_prec,df)
    }
RR<-v1/v2
```

```
## priors
mu~dnorm(0,0.000001)
bs_sd~dunif(0,10)
bs_var<-bs_sd*bs_sd
bs_prec<-1/bs_var
v1~dunif(0,1)
v2~dunif(0,1)
df~dunif(2,100)
}
```
