# Supplementary material for: Publication Bias in Recent Meta-Analyses
Source: PubMed Central journal article supplement (PMC3868709; doi:10.1371/journal.pone.0081823), 2013-11-27

## APPENDIX 5: SENSITIVITY ANALYSIS FOR META-ANALYSES OF CLINICAL TRIALS

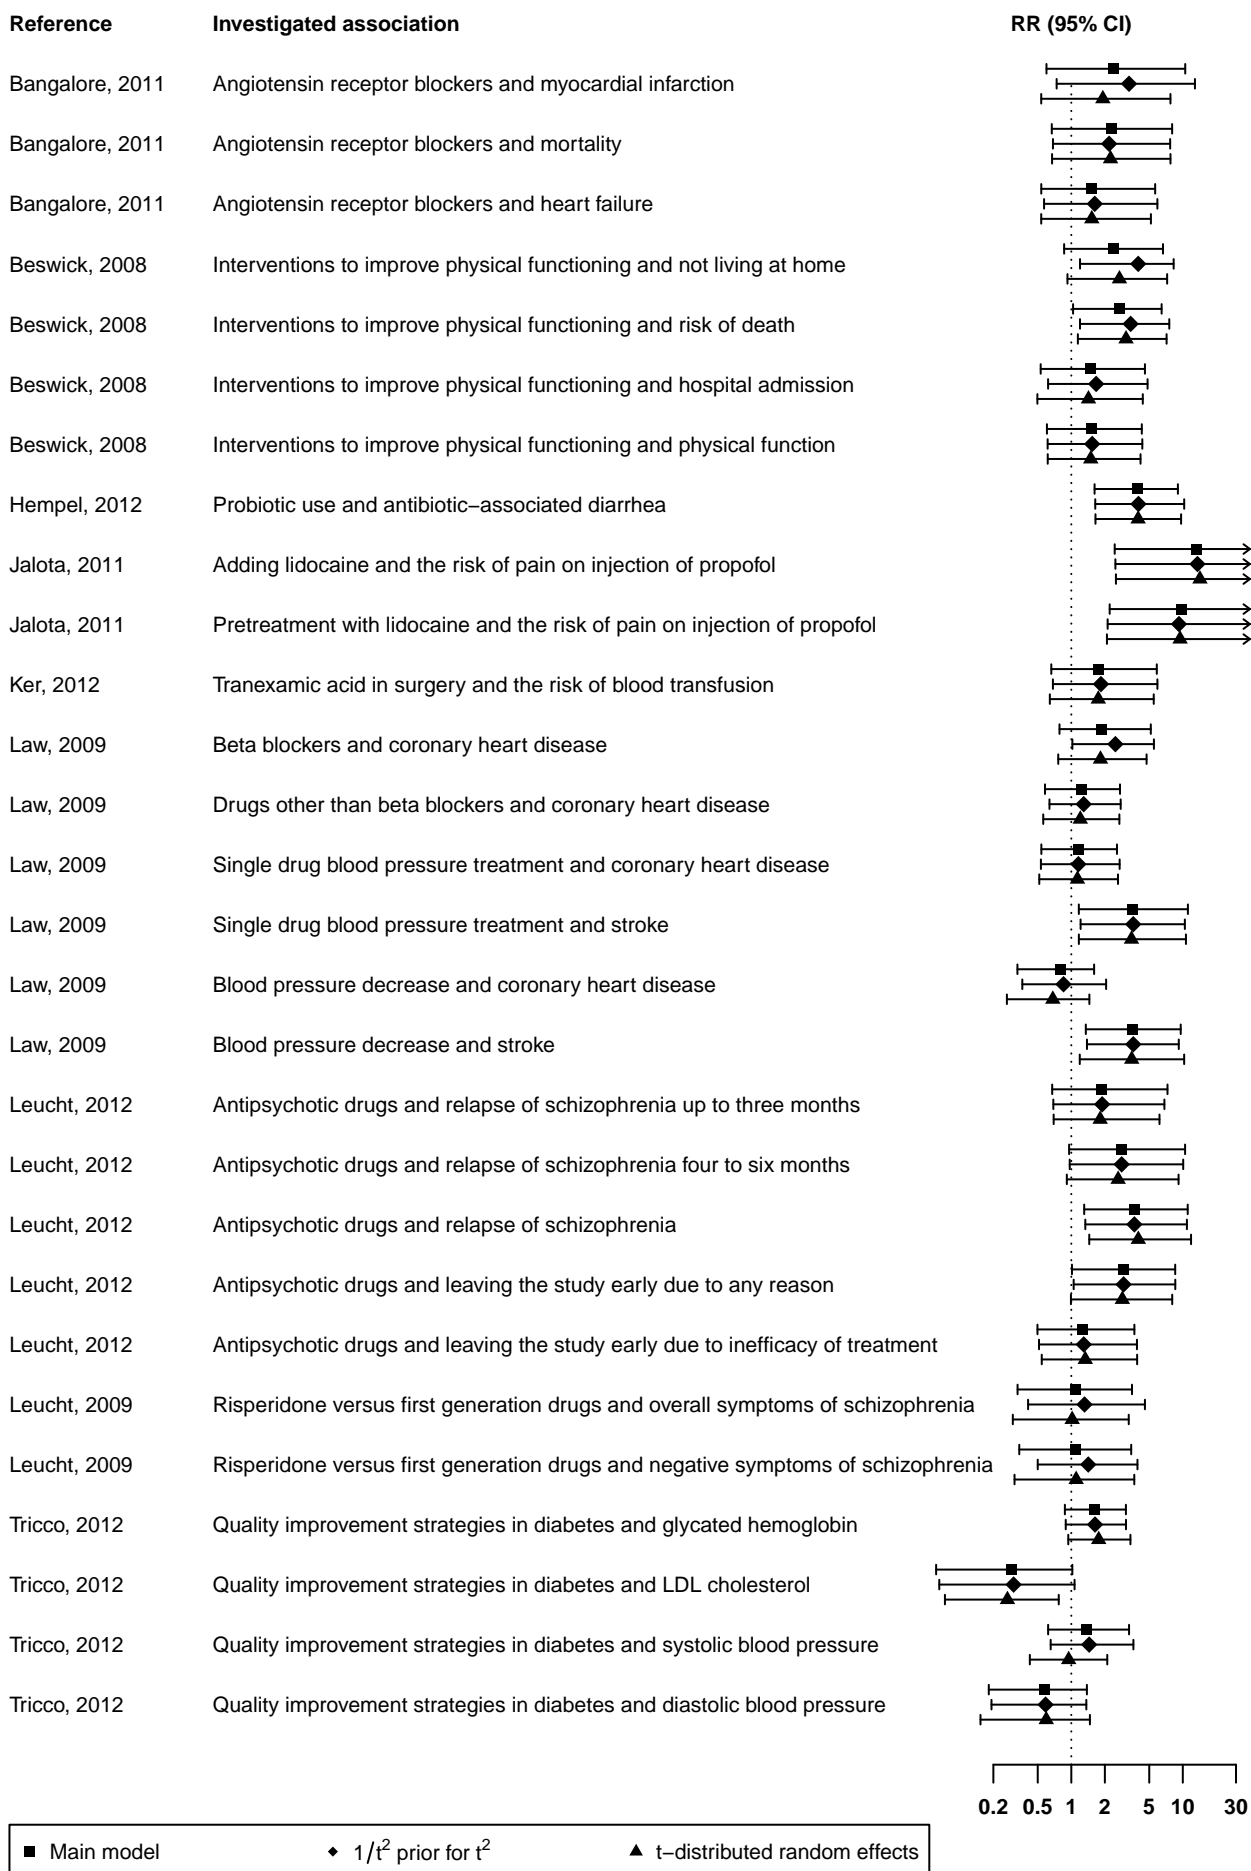

Supplement: pone.0081823.s005.pdf [file pone.0081823.s005.pdf]
