# Supplementary material for: Publication Bias in Recent Meta-Analyses
Source: PubMed Central journal article supplement (PMC3868709; doi:10.1371/journal.pone.0081823), 2013-11-27

## APPENDIX 6: SENSITIVITY ANALYSIS FOR META-ANALYSES OF OBSERVATIONAL STUDIES

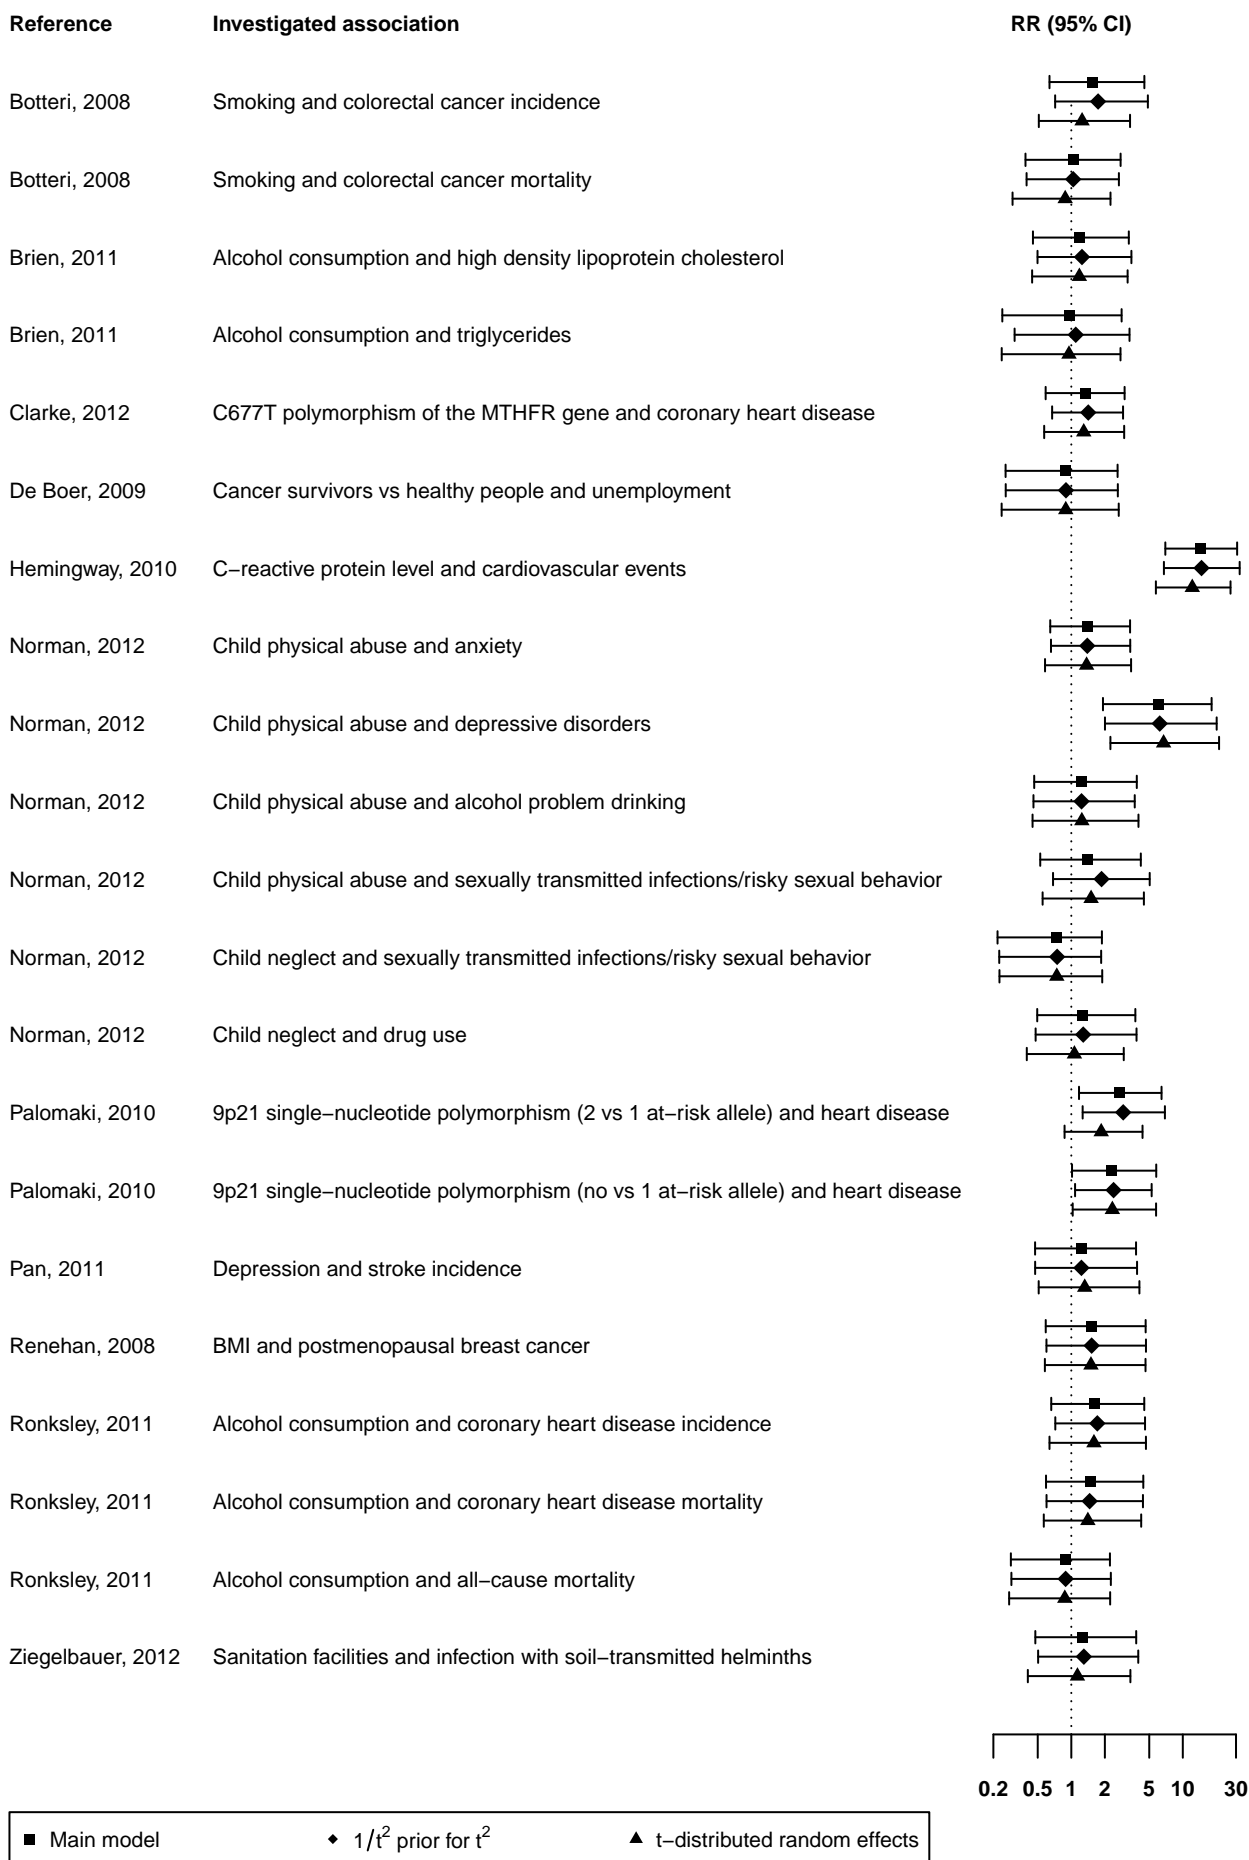

Supplement: pone.0081823.s006.pdf [file pone.0081823.s006.pdf]
